# Supplementary material for: Wnt addiction of genetically defined cancers reversed by PORCN inhibition
Source: Springer Nature journal article supplement (doi:10.1038/onc.2015.280), 2015-08-10
Supplement: 41388_2016_BFonc2015280_MOESM38_ESM.pdf [file 41388_2016_BFonc2015280_MOESM38_ESM.pdf]

**Supplementary Table 3:** Fold changes and p-values for known markers of colon stem cells and differentiated intestinal tissue.

| Group                 | Cell line       | Gene symbol   | Log <sub>2</sub> fold change | BH-adjusted p-value |          |
|-----------------------|-----------------|---------------|------------------------------|---------------------|----------|
| Stem cell             | Stem cell       | <i>LRIG1</i>  | 2.56                         | 2.22E-75            |          |
|                       |                 | <i>TERT</i>   | 3.46                         | 1.70E-06            |          |
|                       |                 | <i>BMI1</i>   | 0.29                         | 3.12E-01            |          |
|                       |                 | <i>ASCL2</i>  | 7.50                         | 1.45E-83            |          |
|                       |                 | <i>LGR5</i>   | 4.71                         | 1.67E-13            |          |
|                       |                 | <i>OLFM4</i>  | 0.47                         | 3.28E-01            |          |
|                       |                 | <i>HOPX</i>   | --                           | --                  |          |
| Differentiated tissue | Goblet          | <i>MUC12</i>  | -2.59                        | 1.66E-58            |          |
|                       |                 | <i>MUC13</i>  | -1.68                        | 2.18E-43            |          |
|                       |                 | <i>MUC4</i>   | -1.98                        | 4.01E-24            |          |
|                       |                 | <i>MUC1</i>   | -1.51                        | 9.05E-23            |          |
|                       |                 | <i>MUC17</i>  | -1.79                        | 4.62E-19            |          |
|                       |                 | <i>MUC20</i>  | -1.15                        | 2.99E-17            |          |
|                       |                 | <i>MUC3A</i>  | -1.12                        | 1.04E-11            |          |
|                       |                 | <i>ATOH1</i>  | 2.64                         | 7.39E-08            |          |
|                       |                 | <i>SPN</i>    | 2.93                         | 2.58E-06            |          |
|                       |                 | <i>MUC2</i>   | -1.02                        | 3.29E-04            |          |
|                       |                 | <i>MUC5AC</i> | -1.71                        | 1.36E-02            |          |
|                       |                 | <i>MUC5B</i>  | -1.00                        | 6.54E-02            |          |
|                       |                 | <i>CD164</i>  | -0.31                        | 2.23E-01            |          |
|                       |                 | <i>MUC16</i>  | -0.40                        | 5.98E-01            |          |
|                       |                 | <i>MUC6</i>   | 0.11                         | 9.12E-01            |          |
|                       |                 | <i>MUC19</i>  | --                           | --                  |          |
|                       |                 | <i>MUC7</i>   | --                           | --                  |          |
|                       | <i>MUC8</i>     | --            | --                           |                     |          |
|                       | <i>MUC15</i>    | --            | --                           |                     |          |
|                       | Enterocyte      |               | <i>FABP2</i>                 | -1.69               | 2.91E-19 |
|                       |                 |               | <i>SLC5A1</i>                | -1.36               | 8.00E-16 |
|                       |                 |               | <i>SI</i>                    | -1.53               | 1.20E-06 |
|                       | Enteroendocrine |               | <i>NEUROG3</i>               | 2.24                | 4.32E-03 |
|                       |                 |               | <i>GAST</i>                  | -1.03               | 6.53E-02 |
|                       |                 |               | <i>GCG</i>                   | 1.22                | 1.83E-01 |
|                       |                 |               | <i>NTS</i>                   | 1.13                | 2.23E-01 |
|                       |                 |               | <i>SYP</i>                   | 0.47                | 3.37E-01 |
|                       |                 |               | <i>CHGA</i>                  | -0.74               | 3.86E-01 |
|                       |                 |               | <i>CCK</i>                   | -0.18               | 8.70E-01 |
|                       |                 |               | <i>FFAR3</i>                 | --                  | --       |
|                       |                 |               | <i>NEUROD1</i>               | --                  | --       |
|                       |                 |               | <i>HDC</i>                   | --                  | --       |
|                       |                 |               | <i>SST</i>                   | --                  | --       |
|                       |                 |               | <i>GIP</i>                   | --                  | --       |
|                       |                 |               | <i>SCT</i>                   | --                  | --       |
|                       | <i>PYY</i>      | --            | --                           |                     |          |
|                       | Paneth          |               | <i>DEFB1</i>                 | -1.59               | 9.29E-15 |
|                       |                 |               | <i>LYZ</i>                   | 1.41                | 3.77E-14 |
|                       |                 |               | <i>TNF</i>                   | -2.04               | 3.18E-12 |
|                       |                 |               | <i>MMP7</i>                  | 0.74                | 2.20E-04 |
|                       |                 |               | <i>DEFA6</i>                 | 2.28                | 7.11E-03 |
|                       |                 |               | <i>DEFA5</i>                 | 2.21                | 7.98E-03 |
|                       |                 |               | <i>DEFB4A</i>                | -1.00               | 1.97E-02 |
| <i>ANG</i>            |                 |               | -0.29                        | 1.72E-01            |          |
| <i>DEFB103A</i>       |                 |               | --                           | --                  |          |
| <i>DEFB106A</i>       |                 |               | --                           | --                  |          |

Gene expression changes are reported as Log<sub>2</sub> fold-changes between untreated (vehicle) and ETC-159 treated tumors. BH-adjusted p-value refers to Benjamini-Hochberg adjusted P-values of differential expression after correction of multiple testing (see also Supplementary Table 1). Missing values (indicated with "--") are for those genes that do not appear to be expressed in the samples/conditions assayed.
